# Supplementary material
Source: PubMed Central journal article supplement (PMC4327908)

## Supplemental Figure Legends

**Fig. S1a.** Western blot analysis of BAX and BCL-2 expression in various treatment groups. **b** and **c.** Quantitation of band intensities. Data for BAX (**b**) and BCL-2 (**c**) were normalized to GAPDH. Values are means  $\pm$  SEM (n=5). Means with unlike superscripts are significantly ( $p<0.05$ ) different. **d.** Changes in the in vivo patterns of hepatic BAX (panels I-III) and BCL-2 (panels IV-VI) expression as detected by immunohistochemistry in mice fed NCD (panels I and IV) or HFD in the absence (panels II and V) or presence (panels III and VI) of nicotine. Scale bar=20  $\mu$ m.

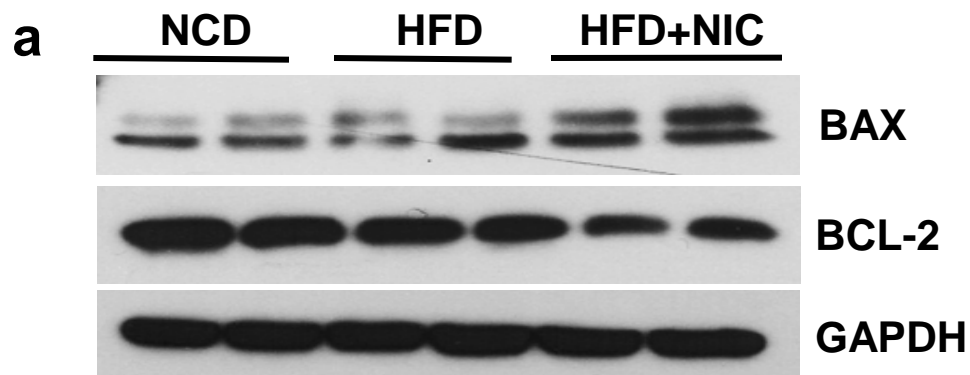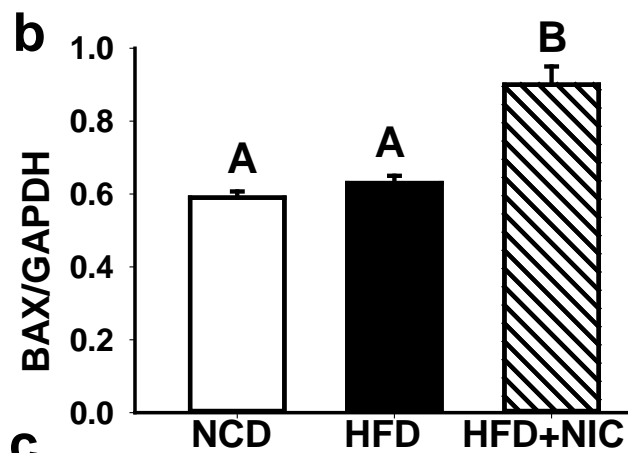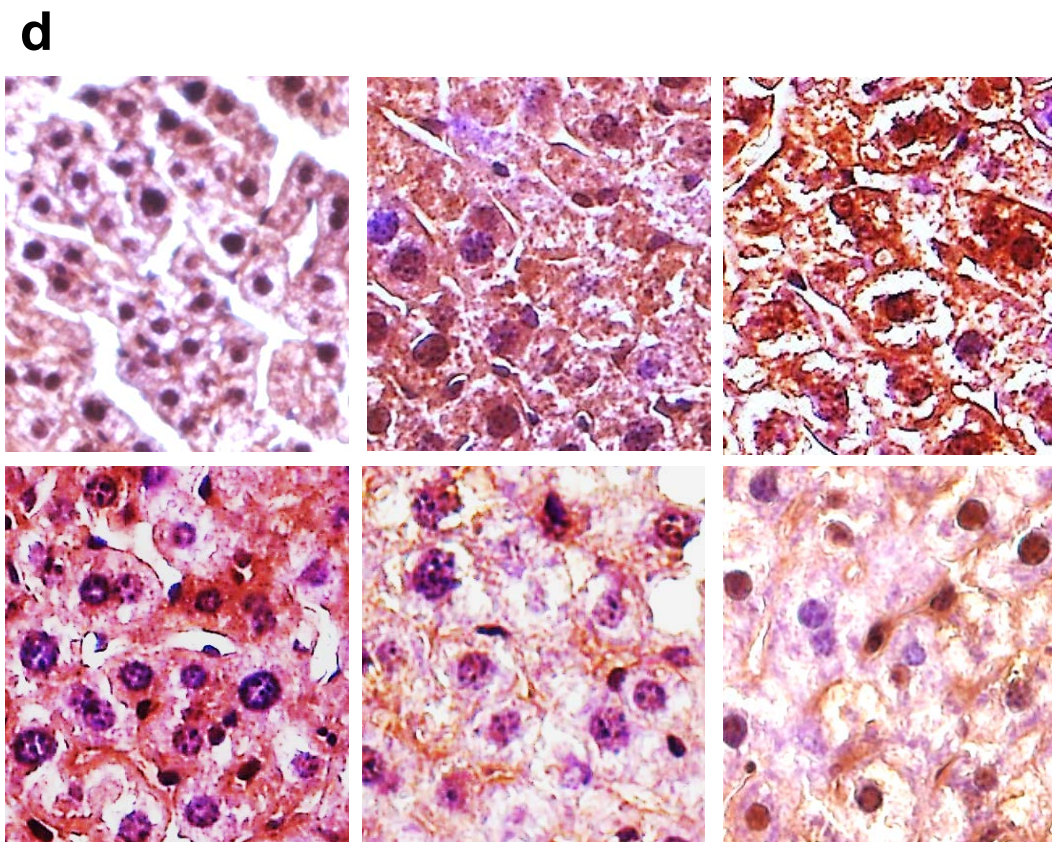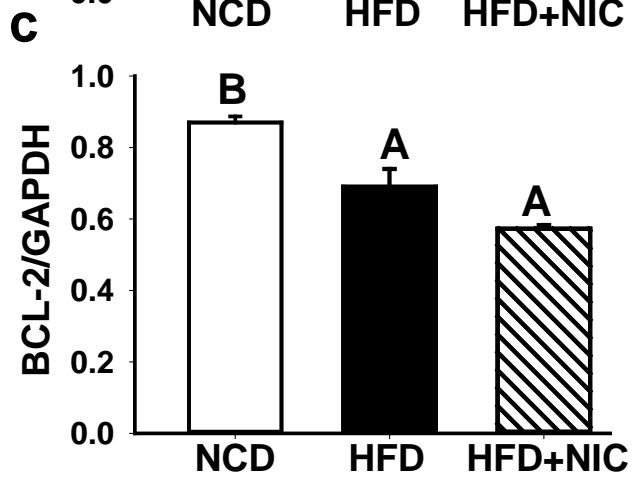

Supplement: NIHMS661553-supplement-supplement_1.pdf [file NIHMS661553-supplement-supplement_1.pdf]
